# Supplementary material
Source: publisher site journal article supplement (https://www.dovepress.com/get_supplementary_file.php?f=01_Nov_2019_SuppExcel-1.xlsx)
Supplement: Supplementary file 1 [file get_supplementary_file.php]

## Sheet: Expression Matrix
# This page contains an expression matrix for all 2 slides. # Column "Name": the name of each miRNA. # Column "ID": array ID of the probes, each miRNA always has its unique probe, but some miRNAs may have two different probes. # Column "Fold change": the ratio of normalized intensities between two conditions (use normalized data, ratio scale). # Column "ForeGround": the foreground intensity of ea…
		Fold change	ForeGround		ForeGround-BackGround		Normalized
ID	Name	2 vs 1	2	1	2	1	2	1
42638	rno-miR-23a-5p	0.693584	77	89	27	36	0.079646	0.114833
42826	rno-miR-300-5p	0.801748	440.5	504	391	451	1.15339	1.4386
42722	rno-miR-346	0.787977	122	137.5	72	84.5	0.212389	0.269537
42645	rno-miR-878	0.72374	59.5	65	9	11.5	0.0265487	0.0366826
42821	rno-miR-295-5p	N/A	43.5	48.5	-6	-4	N/A	N/A
11052	rno-miR-31a-5p	1.60295	649	397.5	598	345	1.76401	1.10048
42632	rno-miR-196c-5p	0.89289	64.5	67.5	14	14.5	0.0412979	0.046252
42810	rno-miR-149-5p	0.826581	483.5	538.5	433.5	485	1.27876	1.54705
17506	rno-miR-24-3p	0.919664	10840	10902	10789	10849	31.826	34.6061
11271	rno-miR-349	2.77434	51.5	52.5	1.5	0.5	0.00442478	0.0015949
42685	rno-miR-871-5p	N/A	48.5	52	-1.5	-1	N/A	N/A
10919	rno-miR-103-3p	0.829688	5782.5	6442.5	5732.5	6389.5	16.91	20.3812
42767	rno-miR-34c-3p	0.78754	237	272.5	186.5	219	0.550147	0.698565
42665	rno-miR-543-5p	0.786062	59	62	8.5	10	0.0250737	0.0318979
146079	rno-miR-547-3p	N/A	49	51.5	0.5	-1.5	0.00147493	N/A
146177	rno-miR-3585-5p	1.23304	52	54.5	2	1.5	0.00589971	0.00478469
145977	rno-miR-1247-5p	0.528445	57.5	66.5	6	10.5	0.0176991	0.0334928
145838	rno-miR-125b-1-3p	0.851632	131	141.5	81.5	88.5	0.240413	0.282297
145678	rno-miR-150-5p	0.958504	859.5	835	810	781.5	2.38938	2.49282
147199	rno-miR-27b-3p	1.33036	3604.5	2522.5	3554	2470.5	10.4838	7.88038
147165	rno-let-7b-5p	0.841672	2512.5	2758	2461	2704	7.25959	8.6252
147186	rno-miR-200b-3p	0.30826	52	60	2.5	7.5	0.00737463	0.0239234
148322	rno-miR-3541	0.70534	73	84	22.5	29.5	0.0663717	0.0940989
148185	rno-miR-471-3p	N/A	44.5	47.5	-7	-8	N/A	N/A
148350	rno-miR-3588	N/A	46	47	-4.5	-6	N/A	N/A
148142	rno-miR-451-3p	N/A	46.5	50	-4.5	-3.5	N/A	N/A
148152	rno-miR-218b	0.868732	66.5	69	15.5	16.5	0.0457227	0.0526316
148513	rno-miR-190b-3p	N/A	45.5	47.5	-5.5	-5	N/A	N/A
148469	rno-miR-412-5p	N/A	45	49	-5	-4.5	N/A	N/A
148477	rno-miR-1843a-5p	0.871239	230	242.5	179	190	0.528024	0.606061
148572	rno-miR-3553	N/A	50	51.5	-0.5	-2	N/A	N/A
148391	rno-miR-3068-5p	0.974072	1869	1778.5	1818	1726	5.36283	5.50558
148306	rno-miR-381-3p	1.05027	404	363.5	351.5	309.5	1.03687	0.987241
148150	rno-miR-3559-5p	0.640231	57	62.5	4.5	6.5	0.0132743	0.0207337
11234	rno-miR-350	0.948785	504.5	496	454.5	443	1.34071	1.41308
30442	rno-miR-802-5p	N/A	49.5	53.5	-0.5	1	N/A	0.00318979
168937	rno-miR-138-1-3p	0.918913	285	289.5	235	236.5	0.693215	0.754386
28019	rno-miR-10a-3p	1.00051	179	173	125.5	116	0.370206	0.370016
28191	rno-miR-30e-5p	0.965384	11667	11182.5	11614	11125.5	34.2596	35.488
42938	rno-miR-343	N/A	48	51.5	-6	-6	N/A	N/A
42770	rno-miR-665	0.84092	417	454	361	397	1.0649	1.26635
11260	rno-miR-151-5p	1.02807	481.5	443	428	385	1.26254	1.22807
31388	rno-miR-291a-5p	0.828602	109	120.5	56	62.5	0.165192	0.199362
11113	rno-miR-448-3p	0.924779	108	113.5	54.5	54.5	0.160767	0.173844
14313	rno-miR-499-5p	0.849593	223	241	169.5	184.5	0.5	0.588517
46510	rno-miR-1188-5p	1.32111	59.5	62	5	3.5	0.0147493	0.0111643
42811	rno-miR-542-5p	0.42243	72.5	97	18.5	40.5	0.0545723	0.129187
11208	rno-miR-207	0.851303	894.5	970.5	840	912.5	2.47788	2.91069
11227	rno-miR-329-3p	1.03154	1726	1555.5	1671.5	1498.5	4.93068	4.7799
11018	rno-miR-218a-5p	1.03753	5907	5274.5	5852.5	5216.5	17.264	16.6396
11077	rno-miR-363-3p	N/A	53.5	55.5	-1	-2.5	N/A	N/A
42686	rno-miR-136-3p	0.920786	1898	1911	1845	1853	5.44248	5.91069
13485	rno-miR-10a-5p	0.918147	5523	5566.5	5468.5	5508	16.1313	17.5694
46917	rno-miR-205	1.15597	77.5	77	22.5	18	0.0663717	0.0574163
42769	rno-let-7b-3p	0.938581	191	192.5	136	134	0.40118	0.427432
11240	rno-miR-409a-3p	0.856277	91.5	99	37.5	40.5	0.110619	0.129187
146038	rno-miR-504	1.10973	56.5	60.5	3	2.5	0.00884956	0.00797448
145701	rno-miR-668	0.880047	506	532	452.5	475.5	1.33481	1.51675
145843	rno-miR-330-5p	1.02271	973.5	888.5	919	831	2.71091	2.65072
145638	rno-miR-29a-5p	1.38847	1391	947.5	1337	890.5	3.94395	2.84051
145897	rno-miR-92b-3p	0.988557	132	130.5	77.5	72.5	0.228614	0.23126
147195	rno-miR-18a-5p	N/A	57	58.5	2.5	0	0.00737463	N/A
148562	rno-miR-128-1-5p	N/A	48.5	50.5	-6	-8	N/A	N/A
148040	rno-miR-1247-3p	N/A	46.5	47	-9	-12	N/A	N/A
148016	rno-miR-336-3p	N/A	47	51	-6.5	-6	N/A	N/A
148459	rno-miR-3593-3p	N/A	52	57	-2	0	N/A	N/A
148612	rno-miR-3561-5p	0.554867	57	65	4.5	7.5	0.0132743	0.0239234
148511	rno-miR-3595	0.924779	67	69.5	13	13	0.0383481	0.0414673
148530	rno-miR-466c-3p	0.898079	238	247.5	185	190.5	0.545723	0.607656
148389	rno-miR-3571	0.817455	2518	2845.5	2464	2787.5	7.26844	8.89155
148576	rno-miR-92a-2-5p	N/A	49.5	56.5	-4	-3	N/A	N/A
148435	rno-miR-672-3p	0.827558	230	255.5	174.5	195	0.514749	0.62201
148329	rno-miR-3587	N/A	45	48	-10.5	-11	N/A	N/A
148600	rno-miR-196c-3p	0.908338	165	170	110.5	112.5	0.325959	0.358852
148555	rno-miR-544-5p	1.08798	74.5	76	20	17	0.0589971	0.0542265
148153	rno-miR-489-5p	N/A	46.5	50	-7	-8	N/A	N/A
148392	rno-miR-208b-5p	N/A	46.5	48	-7	-11	N/A	N/A
148301	rno-miR-293-3p	N/A	46	51.5	-7	-5.5	N/A	N/A
27565	rno-miR-423-5p	0.666385	199	261	147	204	0.433628	0.650718
169336	rno-miR-17-5p	0.86491	394	422	339.5	363	1.00147	1.15789
168830	rno-miR-148b-5p	N/A	56.5	54.5	1.5	-3	0.00442478	N/A
17608	rno-miR-425-5p	1.07586	377.5	336	324	278.5	0.955752	0.888357
30787	rno-miR-125b-5p	0.920245	35982.5	36165	35929.5	36106.5	105.987	115.172
42511	rno-miR-99a-3p	0.950366	184.5	184	130	126.5	0.383481	0.403509
28250	rno-miR-872-5p	0.899028	455.5	472	401.5	413	1.18437	1.31738
17312	rno-miR-592	1.07741	113	109.5	60	51.5	0.176991	0.164274
14289	rno-miR-540-3p	1.00184	72	77.5	19.5	18	0.0575221	0.0574163
14301	rno-miR-361-5p	1.02407	1452.5	1319.5	1397.5	1262	4.12242	4.02552
11215	rno-miR-292-3p	1.84956	57.5	61	5	2.5	0.0147493	0.00797448
11246	rno-miR-434-3p	0.981883	7739	7298	7686	7239	22.6726	23.0909
11273	rno-miR-352	1.17791	3032.5	2399.5	2980.5	2340	8.79204	7.46411
17896	rno-miR-21-3p	1.40727	89	83	35	23	0.103245	0.0733652
42479	rno-miR-29b-1-5p	1.55752	86	78.5	32	19	0.0943953	0.0606061
42913	rno-miR-345-3p	0.858723	90.5	100.5	39	42	0.115044	0.133971
42865	rno-miR-181a-5p	1.05664	12090.5	10592.5	12036	10534	35.5044	33.6013
10138	rno-miR-130a-3p	0.947464	3081	3015	3028	2955.5	8.93215	9.42743
30681	rno-miR-376c-3p	1.09112	330	292	275.5	233.5	0.812684	0.744817
46381	rno-miR-1298	1.00885	95	97.5	42	38.5	0.123894	0.122807
42523	rno-miR-26b-3p	1.51327	71	69.5	18	11	0.0530973	0.0350877
146036	rno-miR-293-5p	N/A	47.5	49.5	-6.5	-10	N/A	N/A
146003	rno-miR-711	N/A	48.5	52.5	-5.5	-8	N/A	N/A
145641	rno-miR-369-5p	1.06368	1318	1158.5	1263.5	1098.5	3.72714	3.50399
146086	rno-miR-30a-5p	1.15254	9736	7828	9683	7769.5	28.5634	24.7831
148658	rno-miR-153-5p	1.10479	209.5	188.5	156.5	131	0.461652	0.417863
148035	rno-miR-3084b-5p	1.22076	517.5	411	464	351.5	1.36873	1.12121
148611	rno-miR-3576	1.19677	64.5	67.5	11	8.5	0.0324484	0.0271132
148012	rno-miR-203b-3p	N/A	45.5	49	-7	-10	N/A	N/A
148067	rno-miR-201-3p	N/A	46.5	49	-7	-10.5	N/A	N/A
148172	rno-miR-216a-3p	1.27157	58.5	64.5	5.5	4	0.0162242	0.0127592
148025	rno-miR-374-3p	1.40258	99.5	90.5	45.5	30	0.134218	0.0956938
148429	rno-miR-344b-1-3p	0.793185	381.5	443.5	328.5	383	0.969027	1.22169
148442	rno-miR-214-5p	1.84956	57	60	3	1.5	0.00884956	0.00478469
145759	rno-miR-181c-3p	0.924779	113.5	120	61	61	0.179941	0.194577
17835	rno-miR-450a-5p/rno-miR-450b-5p	1.14728	136	125.5	82.5	66.5	0.243363	0.212121
42732	rno-miR-532-3p	1.84956	54	59.5	1	0.5	0.00294985	0.0015949
168708	rno-miR-296-5p	N/A	52.5	54	-2	-6.5	N/A	N/A
169132	rno-miR-382-3p	0.914928	426.5	433.5	371.5	375.5	1.09587	1.19777
28161	rno-miR-380-5p	0.855765	112	117.5	62	67	0.182891	0.213716
11202	rno-miR-151-3p	0.797223	138	155	87.5	101.5	0.258112	0.323764
17676	rno-miR-152-3p	1.13656	212.5	185.5	161	131	0.474926	0.417863
46483	rno-miR-27a-3p	0.960505	2511	2422.5	2460	2368.5	7.25664	7.55502
46438	rno-let-7g-5p	0.755072	7024.5	8592	6972	8539	20.5664	27.2376
42703	rno-miR-490-3p	0.862026	181.5	193.5	130.5	140	0.384956	0.446571
42457	rno-miR-323-5p	0.902223	91.5	95.5	40	41	0.117994	0.130781
42712	rno-miR-742-5p	N/A	48.5	50.5	-1.5	-0.5	N/A	N/A
42748	rno-miR-191a-3p	0.904675	73.5	74	22.5	23	0.0663717	0.0733652
28759	rno-miR-758-3p	0.977408	115.5	115	65	61.5	0.19174	0.196172
42496	rno-miR-181c-5p	0.822152	771.5	865	721	811	2.12684	2.58692
10306	rno-miR-146b-5p	1.04675	1253	1116	1201.5	1061.5	3.54425	3.38596
42481	rno-miR-25-5p	0.776814	92	104.5	42	50	0.123894	0.15949
42864	rno-miR-743b-3p	0.678884	116.5	142	63.5	86.5	0.187316	0.275917
10943	rno-miR-136-5p	0.956396	15478	14969.5	15427	14917	45.5074	47.5821
42706	rno-miR-325-3p	0.958238	2428.5	2346	2377	2294	7.0118	7.31738
10977	rno-miR-183-5p	1.0396	473	428	421	374.5	1.24189	1.19458
42530	rno-let-7a-2-3p	0.57629	646	1008.5	594.5	954	1.75369	3.04306
10990	rno-miR-196a-5p	0.936527	609	604	558	551	1.64602	1.75758
14285	rno-miR-487b-3p	0.702957	2066.5	2705	2015.5	2651.5	5.94543	8.45774
31026	rno-miR-101a-3p	1.19618	15073.5	11666.5	15020.5	11612.5	44.3083	37.0415
11040	rno-miR-29b-3p	0.678003	6889	9379.5	6837	9325.5	20.1681	29.7464
46461	rno-miR-1224	0.726612	63	69.5	11	14	0.0324484	0.0446571
28547	rno-miR-675-5p	0.341457	114	216.5	60	162.5	0.176991	0.518341
145998	rno-miR-465-5p	0.592125	97.5	126	44.5	69.5	0.131268	0.221691
145721	rno-miR-875	N/A	50.5	51	-3	-4	N/A	N/A
145705	rno-miR-431	0.936534	171.5	169.5	119.5	118	0.352507	0.376396
145637	rno-miR-187-3p	0.993645	201.5	194	151.5	141	0.446903	0.449761
148627	rno-miR-615	N/A	43.5	47.5	-7	-5	N/A	N/A
148654	rno-miR-184	N/A	47.5	50	-3.5	-4.5	N/A	N/A
148021	rno-miR-3556a	N/A	47.5	51.5	-6	-4	N/A	N/A
148131	rno-miR-9b-5p	1.17497	1792.5	1425	1740	1369.5	5.13274	4.36842
148573	rno-miR-191b	N/A	47.5	47.5	-6.5	-9	N/A	N/A
148569	rno-miR-3560	N/A	45.5	51.5	-4.5	-1.5	N/A	N/A
148359	rno-miR-3596d	0.801475	63	66.5	13	15	0.0383481	0.0478469
148315	rno-miR-3594-3p	0.616519	56.5	60	5	7.5	0.0147493	0.0239234
148044	rno-miR-450a-3p	0.771863	156	179	106	127	0.312684	0.405104
148056	rno-miR-299a-3p/rno-miR-299b-3p	0.924779	55.5	58	4	4	0.0117994	0.0127592
148475	rno-miR-1193-5p	N/A	43.5	44.5	-7.5	-9.5	N/A	N/A
148181	rno-miR-203b-5p	N/A	44	47	-9	-7.5	N/A	N/A
148141	rno-miR-133b-5p	N/A	46	47.5	-6.5	-6.5	N/A	N/A
148386	rno-miR-219b	0.835858	147.5	160	94	104	0.277286	0.331738
148520	rno-miR-137-5p	1.44497	65	64	12.5	8	0.0368732	0.0255183
148284	rno-miR-208b-3p	N/A	51	52.5	-2.5	-2.5	N/A	N/A
168945	rno-miR-326-3p	0.934108	452	450	400.5	396.5	1.18142	1.26475
168936	rno-miR-299a-5p	1.16222	283	239	232.5	185	0.685841	0.590112
42664	rno-miR-301b-3p	0.924779	102	104	45	45	0.132743	0.143541
42717	rno-miR-92b-5p	N/A	50	51	-5	-8.5	N/A	N/A
11274	rno-miR-421-5p	N/A	55.5	56.5	-1.5	-4.5	N/A	N/A
42640	rno-miR-20b-5p	0.638659	182.5	240.5	125	181	0.368732	0.577352
10937	rno-miR-132-3p	1.14395	1185.5	974	1130	913.5	3.33333	2.91388
19016	rno-miR-217-5p	N/A	58.5	61	2.5	0	0.00737463	N/A
42778	rno-let-7g-3p	1.02987	80	82.5	24.5	22	0.0722714	0.0701754
42536	rno-miR-666-3p	1.23304	58	62.5	2	1.5	0.00589971	0.00478469
46835	rno-miR-483-5p	N/A	51.5	55.5	-6	-5.5	N/A	N/A
42862	rno-miR-881-3p	N/A	53	54	-2.5	-6.5	N/A	N/A
42744	rno-miR-23a-3p	0.995341	5987	5569	5931.5	5511	17.4971	17.5789
14271	rno-miR-539-5p	1.17825	1074	858	1018	799	3.00295	2.54864
42971	rno-miR-96-3p	N/A	46	49	-10	-9.5	N/A	N/A
42502	rno-miR-204-3p	0.614333	196.5	271.5	140.5	211.5	0.414454	0.674641
29872	rno-miR-340-5p	0.834994	1823	2017	1767	1957	5.21239	6.24242
11074	rno-miR-34c-5p	0.919868	619	626.5	562	565	1.65782	1.80223
4390	rno-miR-7b	0.942661	240.5	241.5	184.5	181	0.544248	0.577352
146082	rno-miR-1956-5p	N/A	52	57	-4	-4.5	N/A	N/A
145677	rno-miR-139-5p	0.953743	516	505	461	447	1.35988	1.42584
145633	rno-let-7d-3p	0.59643	199.5	281	143.5	222.5	0.423304	0.709729
146008	rno-miR-26b-5p	1.00501	7021.5	6468.5	6965	6409	20.5457	20.4434
145643	rno-miR-382-5p	1.08579	1923	1648.5	1868	1591	5.51032	5.07496
148403	rno-miR-3065-3p	N/A	53.5	55.5	-3	-5.5	N/A	N/A
148595	rno-miR-34a-3p	0.874894	171	180.5	114	120.5	0.336283	0.38437
148581	rno-miR-3557-3p	N/A	57	59.5	2	-1	0.00589971	N/A
148480	rno-miR-494-5p	0.795074	289.5	333	236	274.5	0.696165	0.875598
148089	rno-miR-208a-3p	N/A	51	52.5	-4.5	-6	N/A	N/A
148174	rno-miR-653-3p	N/A	51	53	-5	-5.5	N/A	N/A
148213	rno-miR-17-2-3p	N/A	50	50.5	-5	-9	N/A	N/A
148271	rno-miR-328b-3p	0.915166	296.5	299	238	240.5	0.702065	0.767145
148053	rno-miR-667-5p	0.761583	64	68.5	7	8.5	0.020649	0.0271132
148297	rno-miR-92a-1-5p	N/A	52	53.5	-6.5	-7.5	N/A	N/A
148075	rno-miR-206-5p	1.09817	66	69.5	9.5	8	0.0280236	0.0255183
148175	rno-miR-1843a-3p	1.01399	909.5	838.5	852.5	777.5	2.51475	2.48006
148337	rno-miR-3592	1.58534	61.5	65.5	6	3.5	0.0176991	0.0111643
148066	rno-miR-216b-3p	N/A	49.5	51	-6.5	-10.5	N/A	N/A
148294	rno-miR-217-3p	N/A	55.5	56.5	-1	-5	N/A	N/A
148119	rno-miR-3559-3p	N/A	51.5	55	-4.5	-6	N/A	N/A
148215	rno-miR-3591	1.11834	82	81.5	26	21.5	0.0766962	0.0685805
168890	rno-miR-1306-5p	0.336283	59.5	71.5	4	11	0.0117994	0.0350877
17438	rno-miR-449c-5p	N/A	46	48.5	-9.5	-11.5	N/A	N/A
10928	rno-miR-125a-5p	0.948292	11349	11072.5	11292.5	11012.5	33.3112	35.1276
42953	rno-miR-101b-3p	1.20596	3951.5	3046	3896.5	2988	11.4941	9.5311
29529	rno-miR-369-3p	1.07312	1707	1484	1653	1424.5	4.87611	4.54386
11229	rno-miR-341	0.917291	2260	2282	2205	2223	6.50442	7.09091
33902	rno-miR-128-3p	1.07033	4684.5	4060.5	4629	3999.5	13.6549	12.7576
42568	rno-miR-880-3p	N/A	50.5	53.5	-3.5	-7	N/A	N/A
32608	rno-miR-761	0.30826	56.5	64.5	1.5	4.5	0.00442478	0.0143541
42615	rno-miR-135b-3p	N/A	52.5	55	-2	-5.5	N/A	N/A
42850	rno-miR-150-3p	N/A	48	48.5	-8	-12	N/A	N/A
17624	rno-miR-532-5p	0.952522	106.5	112.5	51.5	50	0.151917	0.15949
42684	rno-miR-219a-1-3p	N/A	48.5	51.5	-8.5	-9.5	N/A	N/A
46223	rno-miR-1306-3p	N/A	51	54	-4.5	-7.5	N/A	N/A
19585	rno-miR-148b-3p	0.988178	865	818	810.5	758.5	2.39086	2.41946
14272	rno-miR-542-3p	1.15597	118.5	110	62.5	50	0.184366	0.15949
11235	rno-miR-351-5p	1.24795	181.5	153	125.5	93	0.370206	0.296651
42507	rno-miR-202-5p	N/A	48	50.5	-7.5	-10	N/A	N/A
146078	rno-miR-632	5.54867	62	60.5	6	1	0.0176991	0.00318979
146144	rno-miR-678	N/A	50.5	52.5	-6	-7	N/A	N/A
145859	rno-miR-33-5p	0.80673	4373.5	5011.5	4319	4951	12.7404	15.7927
145827	rno-miR-200a-5p	N/A	47	50.5	-9	-9	N/A	N/A
145889	rno-miR-196b-5p	0.590323	220.5	312.5	161.5	253	0.476401	0.807018
147572	rno-miR-3120	N/A	52.5	54	-3	-5	N/A	N/A
148147	rno-miR-181b-1-3p	1.35914	103.5	94	48.5	33	0.143068	0.105263
148534	rno-miR-103-1-5p	0.939342	119.5	125.5	64.5	63.5	0.190265	0.202552
148381	rno-miR-449c-3p	N/A	48.5	48.5	-6	-11	N/A	N/A
148291	rno-miR-496-5p	N/A	56.5	60.5	0	1	N/A	0.00318979
148462	rno-miR-3585-3p	N/A	48	51	-7.5	-8.5	N/A	N/A
148304	rno-miR-212-5p	1.00822	128	128	72.5	66.5	0.213864	0.212121
148501	rno-miR-425-3p	0.817558	114	130	61	69	0.179941	0.220096
148614	rno-miR-7a-2-3p	0.906283	179.5	185.5	122.5	125	0.361357	0.398724
148436	rno-miR-3584-5p	1.09652	97.5	92.5	41.5	35	0.122419	0.111643
148460	rno-miR-500-5p	N/A	51	53.5	-5	-5.5	N/A	N/A
148507	rno-miR-539-3p	0.990372	1279	1202.5	1223	1142	3.60767	3.64274
148099	rno-miR-344b-3p	0.920705	394.5	400.5	339	340.5	1	1.08612
168872	rno-miR-24-1-5p	0.931929	445.5	445	391	388	1.15339	1.23764
168865	rno-miR-543-3p	0.995916	120	118.5	63	58.5	0.185841	0.186603
46210	rno-miR-1249	1.08992	67.5	68	16.5	14	0.0486726	0.0446571
42923	rno-miR-30c-5p	1.02941	14957	13442.5	14905	13390	43.9676	42.7113
11231	rno-miR-345-5p	0.943807	175.5	176	124	121.5	0.365782	0.38756
42808	rno-miR-874-3p	1.05133	106.5	100.5	54	47.5	0.159292	0.151515
10975	rno-miR-182	1.19154	489	391.5	435.5	338	1.28466	1.07815
19601	rno-miR-211-5p	N/A	53	52.5	-1.5	-3	N/A	N/A
33596	rno-miR-126a-5p	1.00923	4629	4245	4577	4194	13.5015	13.378
29190	rno-miR-708-5p	0.891504	1082.5	1122.5	1031.5	1070	3.04277	3.41308
42709	rno-miR-743b-5p	0.635785	58	62.5	5.5	8	0.0162242	0.0255183
42456	rno-miR-598-3p	0.886995	768.5	802	716	746.5	2.11209	2.38118
42883	rno-miR-883-3p	0.712186	120.5	141.5	67	87	0.19764	0.277512
10988	rno-miR-194-5p	0.749664	309.5	374.5	259	319.5	0.764012	1.01914
32946	rno-miR-486	1.31259	75.5	73.5	22	15.5	0.0648968	0.0494418
11225	rno-miR-322-3p	2.31195	61.5	57.5	7.5	3	0.0221239	0.00956938
42553	rno-miR-216a-5p	0.858723	58.5	61	6.5	7	0.019174	0.0223285
42546	rno-miR-511-5p	N/A	46	48.5	-6.5	-7	N/A	N/A
42595	rno-miR-291a-3p	0.701556	87	98.5	33	43.5	0.0973451	0.138756
42763	rno-miR-347	0.949698	222	222.5	171.5	167	0.5059	0.532695
11249	rno-miR-463-5p	N/A	50	50	-4	-6.5	N/A	N/A
11245	rno-miR-433-5p	0.64958	1811.5	2558.5	1758.5	2503.5	5.18732	7.98565
31867	rno-miR-145-3p	1.08379	183	167.5	129.5	110.5	0.382006	0.352472
146012	rno-miR-1949	1.14152	131.5	118	79	64	0.233038	0.204147
145852	rno-miR-210-3p	0.701458	178	218	122.5	161.5	0.361357	0.515152
145742	rno-miR-935	0.605607	91	108	37	56.5	0.109145	0.180223
145634	rno-miR-132-5p	1.00958	559.5	518.5	506	463.5	1.49263	1.47847
147949	rno-miR-101b-5p	N/A	49	51	-3.5	-4	N/A	N/A
148471	rno-miR-152-5p	4.62389	56	56	2.5	0.5	0.00737463	0.0015949
148280	rno-miR-466b-2-3p/rno-miR-466b-4-3p	0.712443	178	218	127.5	165.5	0.376106	0.527911
148277	rno-miR-3542	0.770649	83.5	90	32.5	39	0.0958702	0.124402
148539	rno-miR-3583-5p	N/A	47.5	50	-6.5	-5.5	N/A	N/A
148497	rno-miR-3573-5p	1.84956	54	56	2	1	0.00589971	0.00318979
148400	rno-miR-298-3p	2.03451	57.5	57.5	5.5	2.5	0.0162242	0.00797448
148192	rno-miR-421-3p	1.0657	114.5	108.5	60.5	52.5	0.178466	0.167464
148369	rno-miR-652-5p	N/A	53	55.5	-0.5	0	N/A	N/A
148399	rno-miR-181b-2-3p	N/A	47.5	48.5	-6.5	-8	N/A	N/A
148506	rno-miR-3551-3p	N/A	43.5	46.5	-7.5	-7	N/A	N/A
14312	rno-miR-489-3p	N/A	49	48.5	-5	-4	N/A	N/A
42738	rno-miR-340-3p	0.917167	294	297.5	241	243	0.710914	0.77512
169408	rno-miR-181d-5p	1.05288	2847.5	2508.5	2794.5	2454.5	8.24336	7.82935
42576	rno-miR-342-5p	0.376557	91	141	34	83.5	0.100295	0.266348
42933	rno-miR-466b-5p	N/A	53.5	60.5	-1.5	-2	N/A	N/A
11004	rno-miR-203a-3p	0.385324	86	129	27.5	66	0.0811209	0.210526
19588	rno-miR-17-1-3p	0.630531	79.5	93	22.5	33	0.0663717	0.105263
42907	rno-miR-598-5p	N/A	56	56.5	0	-5.5	N/A	N/A
42916	rno-miR-471-5p	N/A	56.5	58	-1.5	-3.5	N/A	N/A
42572	rno-miR-154-3p	0.840708	157	169.5	100	110	0.294985	0.350877
33177	rno-miR-672-5p	0.44794	74	94	15.5	32	0.0457227	0.102073
10995	rno-miR-199a-3p	0.973168	148.5	146	90.5	86	0.266962	0.274322
11182	rno-miR-98-5p	3.72764	844	258	784	194.5	2.31268	0.620415
27536	rno-miR-190a-5p	0.928287	1780.5	1775.5	1720	1713.5	5.07375	5.46571
42647	rno-miR-743a-3p	N/A	57.5	62.5	0	0.5	N/A	0.0015949
46320	rno-miR-31a-3p	2.5729	336	162	281	101	0.828909	0.322169
11065	rno-miR-335	0.901283	3585.5	3680.5	3529	3621	10.41	11.5502
10925	rno-miR-10b-5p	0.938373	9759	9617.5	9698.5	9558	28.6091	30.488
42670	rno-miR-500-3p	0.972151	293.5	289	236	224.5	0.696165	0.716108
11022	rno-miR-221-3p	1.38354	821	574	763	510	2.25074	1.62679
30768	rno-miR-674-5p	0.871775	370	393	312.5	331.5	0.921829	1.05742
42627	rno-miR-212-3p	1.09145	427	375.5	370	313.5	1.09145	1
10936	rno-miR-130b-3p	0.840708	62	68.5	5	5.5	0.0147493	0.0175439
17851	rno-miR-200c-5p	1.84956	58.5	63	4	2	0.0117994	0.00637959
42730	rno-miR-423-3p	1.25506	201.5	167.5	142.5	105	0.420354	0.334928
17825	rno-miR-338-5p	0.80346	1865.5	2143.5	1808	2081	5.33333	6.63796
42839	rno-miR-135a-5p	0.798617	6260	7243.5	6203.5	7183.5	18.2994	22.9139
145753	rno-miR-484	N/A	53.5	56	-3.5	-4	N/A	N/A
145974	rno-miR-200b-5p	N/A	52.5	56.5	-3	-5	N/A	N/A
148187	rno-miR-410-5p	0.442285	63	72	5.5	11.5	0.0162242	0.0366826
148129	rno-miR-503-3p	N/A	57	58	-1.5	-3.5	N/A	N/A
148591	rno-miR-329-5p	0.267014	284.5	842	225.5	781	0.665192	2.49123
148390	rno-miR-19a-5p	N/A	52.5	53	-5.5	-8	N/A	N/A
148404	rno-miR-299b-5p	0.909366	117.5	121	59	60	0.174041	0.191388
148341	rno-miR-3564	N/A	51.5	56	-4.5	-3.5	N/A	N/A
42829	rno-miR-127-3p	0.907355	1750	1784.5	1692.5	1725	4.99263	5.50239
42601	rno-miR-540-5p	1.11671	121.5	112.5	64	53	0.188791	0.169059
42903	rno-miR-673-5p	N/A	48	50.5	-8	-9.5	N/A	N/A
30973	rno-miR-384-3p	1.18319	4681	3674	4624.5	3614.5	13.6416	11.5295
14305	rno-miR-376b-5p	2.24711	587.5	277	528.5	217.5	1.559	0.69378
10923	rno-miR-107-3p	0.985143	3521.5	3314	3468	3255.5	10.2301	10.3844
13140	rno-miR-138-5p	0.976491	6769	6416	6713	6357.5	19.8024	20.2791
11013	rno-miR-181a-1-3p	1.03423	383	350.5	326	291.5	0.961652	0.929825
29802	rno-miR-144-3p	1.32234	1519.5	1083.5	1463.5	1023.5	4.31711	3.26475
42899	rno-miR-377-5p	1.06705	80	78.5	22.5	19.5	0.0663717	0.062201
17732	rno-miR-192-5p	0.698503	127	153.5	71	94	0.20944	0.299841
46251	rno-miR-1193-3p	0.891898	162.5	170	108.5	112.5	0.320059	0.358852
42669	rno-miR-505-3p	0.947854	322	318	267	260.5	0.787611	0.830941
146019	rno-miR-1839-5p	1.09245	372	326.5	316	267.5	0.932153	0.85327
4040	rno-miR-9a-5p	0.882859	25034.5	26223	24978	26164	73.6814	83.4577
146163	rno-miR-224-3p	0.770649	63	68.5	7.5	9	0.0221239	0.0287081
145749	rno-miR-137-3p	1.0711	890	778.5	834.5	720.5	2.46165	2.29825
145970	rno-miR-129-2-3p	1.13959	368	314	313	254	0.923304	0.810207
145746	rno-let-7i-3p	0.952079	335.5	331	279	271	0.823009	0.864434
145676	rno-miR-30e-3p	0.980411	1202.5	1141	1145.5	1080.5	3.37906	3.44657
148081	rno-miR-3102	N/A	52.5	58.5	-2	0	N/A	N/A
148394	rno-miR-449a-3p	N/A	46.5	46.5	-10	-13	N/A	N/A
148417	rno-miR-1188-3p	0.849185	1426.5	1551.5	1370.5	1492.5	4.04277	4.76077
148372	rno-miR-511-3p	N/A	51.5	51.5	-5.5	-8	N/A	N/A
148250	rno-let-7f-2-3p	0.757805	85.5	95	29.5	36	0.0870206	0.114833
148260	rno-miR-664-2-5p	0.846994	103.5	113	49	53.5	0.144543	0.170654
148584	rno-miR-3572	0.956485	147	146	90.5	87.5	0.266962	0.279107
148606	rno-miR-3579	N/A	46	45.5	-10.5	-14	N/A	N/A
148127	rno-miR-9b-3p	0.709419	195	241	140	182.5	0.412979	0.582137
148029	rno-miR-351-3p	N/A	49.5	50.5	-5	-9	N/A	N/A
168772	rno-miR-224-5p	N/A	45	45.5	-9.5	-13	N/A	N/A
169329	rno-miR-370-3p	0.978131	83	83.5	27.5	26	0.0811209	0.0829346
42460	rno-miR-223-5p	N/A	47	49.5	-4.5	-6.5	N/A	N/A
14297	rno-miR-20b-3p	N/A	48.5	53	-3.5	-3	N/A	N/A
11277	rno-miR-7a-1-3p	1.04195	178.5	164.5	124.5	110.5	0.367257	0.352472
17818	rno-miR-27a-5p	N/A	48.5	48	-5.5	-8	N/A	N/A
27572	rno-miR-298-5p	0.718296	214.5	266.5	163.5	210.5	0.482301	0.671451
14303	rno-miR-376a-3p	1.21318	3839	2943.5	3788	2887.5	11.174	9.21053
11266	rno-miR-336-5p	0.857277	182	192.5	127	137	0.374631	0.437002
32884	rno-miR-342-3p	0.888251	1283.5	1335.5	1228	1278.5	3.62242	4.07815
19596	rno-miR-30d-5p	0.914535	1168.5	1187	1116	1128.5	3.29204	3.59968
11102	rno-miR-410-3p	1.13593	1214.5	1002	1162	946	3.42773	3.01754
11005	rno-miR-204-5p	1.08321	2385	2047.5	2331.5	1990.5	6.87758	6.34928
10986	rno-miR-193a-3p	0.915683	355	360.5	302	305	0.890855	0.972887
18739	rno-miR-186-5p	0.827812	976.5	1086	922	1030	2.71976	3.28549
42451	rno-miR-139-3p	N/A	51.5	53	-3	-4	N/A	N/A
42509	rno-miR-219a-5p	0.654427	4379.5	6168.5	4324.5	6111	12.7566	19.4928
42682	rno-miR-25-3p	0.81354	299	333	245	278.5	0.722714	0.888357
17854	rno-miR-106b-3p	1.32339	94	84.5	41.5	29	0.122419	0.092504
14279	rno-miR-362-5p	N/A	54	54.5	-1	-0.5	N/A	N/A
14300	rno-miR-29c-5p	0.983926	671.5	634	615.5	578.5	1.81563	1.8453
17853	rno-miR-30d-3p	1.27157	89	81.5	33	24	0.0973451	0.076555
27571	rno-miR-292-5p	N/A	48	52	-5	-5	N/A	N/A
42752	rno-miR-872-3p	0.803439	518.5	589.5	463.5	533.5	1.36726	1.70175
10998	rno-miR-19b-3p	0.939965	1231.5	1213	1176	1157	3.46903	3.69059
146194	rno-miR-628	N/A	49.5	51	-6	-4.5	N/A	N/A
145968	rno-let-7d-5p	0.401789	179.5	334.5	121	278.5	0.356932	0.888357
145714	rno-miR-28-3p	0.986431	62	63	8	7.5	0.0235988	0.0239234
147592	rno-miR-3072	0.809181	66	72	14	16	0.0412979	0.0510367
147366	rno-miR-320-5p	0.815981	62	64	7.5	8.5	0.0221239	0.0271132
148207	rno-miR-465-3p	1.00885	61.5	62.5	6	5.5	0.0176991	0.0175439
148559	rno-miR-411-3p	0.958135	1046.5	1014.5	991	956.5	2.9233	3.05104
148121	rno-miR-155-3p	0.993281	67.5	68	14.5	13.5	0.0427729	0.0430622
148201	rno-miR-365-5p	N/A	48.5	51	-5	-5	N/A	N/A
148574	rno-miR-16-3p	N/A	49	51.5	-3	-3	N/A	N/A
148173	rno-miR-126b	1.10973	60.5	60	6	5	0.0176991	0.015949
148257	rno-miR-3546	N/A	46	47.5	-8	-9	N/A	N/A
148587	rno-miR-326-5p	N/A	48.5	49.5	-7.5	-6	N/A	N/A
148050	rno-miR-3558-3p	N/A	53	56.5	-0.5	-0.5	N/A	N/A
148278	rno-miR-138-2-3p	0.782667	1910.5	2249.5	1856	2193	5.47493	6.99522
148046	rno-miR-344a-5p	0.924779	72	74.5	17.5	17.5	0.0516224	0.0558214
42813	rno-miR-876	N/A	50.5	50	-4.5	-7	N/A	N/A
46219	rno-miR-1306-5p	N/A	49	52	-3.5	-4	N/A	N/A
29153	rno-miR-34b-5p	1.44303	825	549.5	768.5	492.5	2.26696	1.57097
11247	rno-miR-434-5p	1.24783	1363	1028	1307.5	969	3.85693	3.09091
11184	rno-miR-99b-5p	0.999003	1372.5	1280.5	1319	1221	3.89086	3.89474
17953	rno-miR-183-3p	0.780756	105.5	120.5	51.5	61	0.151917	0.194577
11207	rno-miR-202-3p	N/A	57.5	58.5	0	-2.5	N/A	N/A
11230	rno-miR-344a-3p	N/A	50	53.5	-3.5	-7	N/A	N/A
42676	rno-miR-495	1.00012	1290.5	1201	1234.5	1141.5	3.64159	3.64115
11093	rno-miR-379-5p	0.945451	2295	2252.5	2241	2192	6.61062	6.99203
42480	rno-miR-485-5p	0.770919	292	345.5	238	285.5	0.702065	0.910686
42538	rno-miR-196a-3p	0.824309	235	263	180.5	202.5	0.532448	0.645933
42847	rno-miR-497-5p	1.18423	287	240	230.5	180	0.679941	0.574163
17478	rno-miR-429	N/A	48	51	-9	-9	N/A	N/A
42723	rno-miR-195-3p	1.07474	78	79.5	21.5	18.5	0.0634218	0.0590112
10997	rno-miR-19a-3p	0.695095	861.5	1131.5	805	1071	2.37463	3.41627
42625	rno-miR-299a-3p	2.58938	61.5	61.5	7	2.5	0.020649	0.00797448
42950	rno-miR-24-2-5p	0.933922	414	412	357.5	354	1.05457	1.12919
11053	rno-miR-32-5p	1.07205	617	542	560.5	483.5	1.65339	1.54226
14295	rno-miR-1-5p	N/A	49	49.5	-6	-10	N/A	N/A
42817	rno-miR-770-5p	1.34242	78	75.5	22.5	15.5	0.0663717	0.0494418
42599	rno-miR-153-3p	1.07713	1668	1445	1612	1384	4.75516	4.41467
42912	rno-miR-339-3p	N/A	61	60	6	-0.5	0.0176991	N/A
145947	rno-miR-301a-5p	N/A	53.5	56.5	-1.5	-4.5	N/A	N/A
145751	rno-miR-23b-5p	N/A	55.5	57.5	-2.5	-2	N/A	N/A
145692	rno-miR-499-3p	1.43854	68	70	14	9	0.0412979	0.0287081
147536	rno-miR-107-5p	1.22986	118.5	108.5	64.5	48.5	0.190265	0.154705
148645	rno-miR-129-5p	0.988251	723.5	688	669.5	626.5	1.97493	1.99841
148357	rno-miR-3589	N/A	48	51.5	-6	-7.5	N/A	N/A
148583	rno-miR-3584-3p	N/A	60.5	60	6.5	0	0.019174	N/A
148314	rno-miR-873-3p	1.08798	66	68	10	8.5	0.0294985	0.0271132
148160	rno-miR-871-3p	N/A	48	49.5	-8	-8.5	N/A	N/A
148549	rno-miR-377-3p	1.43341	70.5	67.5	15.5	10	0.0457227	0.0318979
148135	rno-miR-3583-3p	N/A	54	55	-4.5	-5.5	N/A	N/A
148672	rno-miR-344a-3p	1.17454	143	128	87	68.5	0.256637	0.218501
148111	rno-miR-741-5p	N/A	48	49	-8.5	-10.5	N/A	N/A
148323	rno-miR-3580-5p	4.1615	61	60.5	4.5	1	0.0132743	0.00318979
148204	rno-miR-3562	N/A	53.5	54	-3	-6	N/A	N/A
148347	rno-miR-3558-5p	0.924779	61	66.5	6	6	0.0176991	0.0191388
148261	rno-miR-208a-5p	0.998606	185.5	180	128.5	119	0.379056	0.379585
148017	rno-miR-743a-5p	N/A	53	58	-2.5	-4	N/A	N/A
148069	rno-miR-129-1-3p/rno-miR-129-2-3p	0.838433	391.5	430.5	335	369.5	0.988201	1.17863
148084	rno-miR-880-5p	N/A	46.5	47.5	-8.5	-11.5	N/A	N/A
148116	rno-miR-3578	N/A	45	46	-9.5	-13	N/A	N/A
11023	rno-miR-222-3p	1.68222	1486	845.5	1432.5	787.5	4.22566	2.51196
10916	rno-miR-1b	18.6715	2339	171.5	2281.5	113	6.73009	0.360447
42834	rno-miR-219a-2-3p	0.787986	4396	5153	4340.5	5094	12.8038	16.2488
42743	rno-let-7e-3p	0.959458	136.5	139	83	80	0.244838	0.255183
19595	rno-miR-30a-3p	1.15597	296.5	253.5	242.5	194	0.715339	0.61882
27773	rno-miR-764-3p	N/A	51.5	53	-1	-3.5	N/A	N/A
42844	rno-miR-384-5p	1.07171	1479.5	1286.5	1426	1230.5	4.20649	3.92504
14288	rno-miR-503-5p	0.596631	125	167	70	108.5	0.20649	0.346093
4700	rno-miR-140-5p	1.11444	2308	1926	2250.5	1867.5	6.63864	5.95694
42525	rno-miR-671	4.62389	55	58	2.5	0.5	0.00737463	0.0015949
10947	rno-miR-142-3p	1.41707	4441	2920	4384	2861	12.9322	9.126
42942	rno-miR-134-5p	1.09705	514	445	458.5	386.5	1.35251	1.23285
10955	rno-miR-148a-3p	1.14346	362.5	307	308.5	249.5	0.910029	0.795853
14328	rno-miR-124-3p	1.45488	46811.5	29779	46757.5	29721	137.928	94.8038
42823	rno-miR-27b-5p	0.716704	85.5	96	31	40	0.0914454	0.127592
17427	rno-miR-200c-3p	N/A	57	60	0	2	N/A	0.00637959
28944	rno-miR-667-3p	0.973138	1283.5	1225.5	1227.5	1166.5	3.62094	3.72089
145798	rno-miR-142-5p	1.37172	631.5	447	577	389	1.70206	1.24083
146137	rno-miR-133a-3p	1.12286	532	451	479	394.5	1.41298	1.25837
147198	rno-miR-26a-5p	1.56453	3578.5	2140	3524	2083	10.3953	6.64434
148253	rno-miR-130a-5p	N/A	56.5	59.5	2.5	-0.5	0.00737463	N/A
148051	rno-miR-770-3p	0.959808	123	122.5	68.5	66	0.202065	0.210526
148447	rno-miR-383-3p	1.84956	67	64.5	13	6.5	0.0383481	0.0207337
148133	rno-miR-222-5p	N/A	50.5	52.5	-3.5	-4.5	N/A	N/A
148412	rno-miR-3561-3p	2.46608	59	60.5	4	1.5	0.0117994	0.00478469
148246	rno-miR-133c	N/A	45	48.5	-9.5	-9.5	N/A	N/A
148305	rno-miR-3593-5p	N/A	46	47.5	-8.5	-11	N/A	N/A
148302	rno-miR-409b	N/A	48.5	51.5	-6	-8	N/A	N/A
148401	rno-miR-185-3p	0.850796	123	134	69	75	0.20354	0.239234
148476	rno-miR-3552	N/A	53.5	55.5	-1	-1	N/A	N/A
148519	rno-miR-3580-3p	N/A	55.5	56.5	1.5	-2	0.00442478	N/A
148651	rno-miR-3072	0.924779	81	86	28	28	0.0825959	0.0893142
148608	rno-miR-551b-5p	0.961404	105.5	107.5	52.5	50.5	0.154867	0.161085
148014	rno-miR-210-5p	N/A	47.5	51.5	-5.5	-6	N/A	N/A
42528	rno-miR-296-3p	N/A	58.5	59	4	-0.5	0.0117994	N/A
145825	rno-miR-383-5p	0.943729	552.5	548	498	488	1.46903	1.55662
145744	rno-miR-568	N/A	41.5	43	-12.5	-16	N/A	N/A
46297	rno-miR-3085	N/A	57	58	3	0	0.00884956	N/A
42452	rno-miR-141-5p	0.777988	107	119	53	63	0.156342	0.200957
28456	rno-miR-675-3p	0.264223	55.5	61.5	2	7	0.00589971	0.0223285
27544	rno-miR-363-5p	0.539552	282.5	447.5	229	392.5	0.675516	1.25199
17942	rno-miR-125a-3p	1.04118	134	128	80.5	71.5	0.237463	0.22807
42708	rno-miR-99a-5p	0.945905	2337	2288.5	2283.5	2232.5	6.73599	7.12121
46626	rno-miR-30c-2-3p	1.04264	111.5	106.5	57.5	51	0.169617	0.162679
17347	rno-miR-708-3p	0.981276	220	210.5	165	155.5	0.486726	0.496013
17935	rno-miR-101a-5p	1.4583	135.5	107.5	82	52	0.241888	0.165869
11041	rno-miR-29c-3p	0.869483	8640.5	9187.5	8585.5	9131.5	25.326	29.1276
42630	rno-miR-140-3p	1.04052	1429	1277.5	1375.5	1222.5	4.05752	3.89952
42898	rno-miR-124-5p	0.972407	176	171.5	122.5	116.5	0.361357	0.371611
27533	rno-miR-320-3p	0.720607	113	131.5	60	77	0.176991	0.245614
9938	rno-let-7i-5p	0.551137	1340	2212.5	1285.5	2157	3.79204	6.88038
11020	rno-miR-22-3p	1.04071	11877	10561	11822.5	10505.5	34.8746	33.5104
42490	rno-miR-505-5p	0.687162	107.5	127.5	53.5	72	0.157817	0.229665
4610	rno-miR-126a-3p	1.05886	15180.5	13267	15127	13211.5	44.6224	42.1419
11007	rno-miR-206-3p	0.650328	107	133	54.5	77.5	0.160767	0.247209
13148	rno-miR-195-5p	1.1771	2428	1921	2374.5	1865.5	7.00442	5.95056
29575	rno-miR-32-3p	0.786951	232	263	177	208	0.522124	0.663477
17898	rno-miR-99b-3p	0.889324	205	211	150.5	156.5	0.443953	0.499203
145820	rno-let-7c-5p	1.51831	8014	4902	7959.5	4848	23.4794	15.4641
145846	rno-let-7e-5p	1.18997	4723	3684	4669	3628.5	13.7729	11.5742
148140	rno-miR-181d-3p	N/A	46	45.5	-9.5	-9.5	N/A	N/A
148126	rno-miR-3550	N/A	50.5	51	-4.5	-4	N/A	N/A
148588	rno-miR-192-3p	N/A	46.5	48	-9.5	-6	N/A	N/A
148482	rno-miR-874-5p	N/A	52	54.5	-2	1.5	N/A	0.00478469
148365	rno-miR-146a-3p	0.660556	57	58	2.5	3.5	0.00737463	0.0111643
148345	rno-miR-3586-3p	N/A	42	43	-12	-13	N/A	N/A
148488	rno-miR-3590-5p	N/A	46.5	47	-8	-9	N/A	N/A
148308	rno-miR-702-5p	N/A	49	48.5	-5	-7.5	N/A	N/A
148229	rno-miR-3557-5p	0.80124	167	186	113.5	131	0.334808	0.417863
148472	rno-miR-201-5p	1.04381	110	106	57	50.5	0.168142	0.161085
148592	rno-miR-448-5p	0.877243	154.5	163	101.5	107	0.29941	0.341308
148385	rno-miR-331-5p	0.83487	150	163	97.5	108	0.287611	0.344498
148526	rno-miR-3548	N/A	42	45	-13	-10	N/A	N/A
148456	rno-miR-3547	0.739823	57	57.5	2	2.5	0.00589971	0.00797448
148316	rno-miR-134-3p	0.700136	335	426	280.5	370.5	0.827434	1.18182
148455	rno-miR-741-3p	1.29469	57.5	59.5	3.5	2.5	0.0103245	0.00797448
42876	rno-miR-20a-3p	1.01726	59	60.5	5.5	5	0.0162242	0.015949
42764	rno-miR-412-3p	0.97135	200	193.5	146	139	0.430678	0.443381
168636	rno-miR-122-5p	N/A	44.5	46	-6	-8.5	N/A	N/A
168687	rno-miR-29a-3p	0.669497	7172	9888	7119	9833.5	21	31.3668
168831	rno-miR-433-3p	0.887829	485.5	504	432.5	450.5	1.27581	1.437
169394	rno-miR-1843a-5p	0.993754	248.5	237	194.5	181	0.573746	0.577352
29779	rno-miR-764-5p	1.58534	61	61.5	6	3.5	0.0176991	0.0111643
17653	rno-miR-133a-5p	1.35414	76.5	73	20.5	14	0.060472	0.0446571
42692	rno-miR-127-5p	0.998293	651	613	597.5	553.5	1.76254	1.76555
27578	rno-miR-327	N/A	54.5	56	-1	-3	N/A	N/A
19582	rno-miR-106b-5p	0.907123	800	817.5	745	759.5	2.19764	2.42265
13147	rno-miR-96-5p	1.17372	724.5	585	669.5	527.5	1.97493	1.68262
46918	rno-miR-375-3p	0.543689	162.5	240	107	182	0.315634	0.580542
42849	rno-miR-146b-3p	1.49387	64.5	66	10.5	6.5	0.0309735	0.0207337
17752	rno-let-7f-5p	1.12577	1011	844.5	955	784.5	2.81711	2.50239
11210	rno-miR-215	0.924779	57	61.5	2.5	2.5	0.00737463	0.00797448
29490	rno-miR-7a-5p	1.38649	1595.5	1087	1540.5	1027.5	4.54425	3.27751
42707	rno-miR-294	0.808248	325.5	366.5	270.5	309.5	0.797935	0.987241
17280	rno-miR-15b-5p	0.878629	1036.5	1090.5	980.5	1032	2.89233	3.29187
10967	rno-miR-16-5p	0.968605	7704.5	7359.5	7647	7301	22.5575	23.2887
42799	rno-miR-544-3p	1.50607	84.5	77.5	28.5	17.5	0.0840708	0.0558214
13178	rno-miR-18a-3p	N/A	57	55	2	-3.5	0.00589971	N/A
11092	rno-miR-378a-5p	1.23304	61.5	63	6	4.5	0.0176991	0.0143541
42887	rno-miR-331-3p	0.880533	961	1009	905.5	951	2.67109	3.03349
146080	rno-miR-666-5p	N/A	53	55	-2	-3.5	N/A	N/A
145946	rno-miR-449a-5p	N/A	51	54	-3	-5.5	N/A	N/A
145757	rno-miR-33-3p	0.99966	185.5	181	133.5	123.5	0.393805	0.393939
145708	rno-miR-324-3p	1.13149	105	100	52	42.5	0.153392	0.135566
147501	rno-miR-98-3p	0.891619	176.5	185	121	125.5	0.356932	0.400319
148360	rno-miR-375-5p	N/A	53.5	57	-1	-2	N/A	N/A
148330	rno-miR-190a-3p	1.28276	162	135	107.5	77.5	0.317109	0.247209
148609	rno-miR-487b-5p	0.842576	95.5	104	41	45	0.120944	0.143541
148013	rno-miR-3075	N/A	49.5	50.5	-6	-7.5	N/A	N/A
148219	rno-miR-3596a	0.924779	65.5	66.5	8	8	0.0235988	0.0255183
148287	rno-miR-290	N/A	49.5	51	-6	-6.5	N/A	N/A
148491	rno-miR-501-5p	0.924779	57	60.5	1.5	1.5	0.00442478	0.00478469
148579	rno-miR-3544	0.693584	58	62	3	4	0.00884956	0.0127592
148157	rno-miR-3556b	N/A	46.5	48.5	-8	-9.5	N/A	N/A
148356	rno-miR-203a-5p	N/A	46.5	48.5	-9	-10	N/A	N/A
148057	rno-miR-186-3p	0.984442	71.5	72.5	16.5	15.5	0.0486726	0.0494418
42702	rno-miR-30c-1-3p	0.976879	93	92.5	37.5	35.5	0.110619	0.113238
169053	rno-miR-130b-5p	1.23304	61.5	63	8	6	0.0235988	0.0191388
42786	rno-miR-188-3p	N/A	54	54	0	-2	N/A	N/A
42866	rno-miR-451-5p	1.24258	3311	2480	3257	2424	9.60767	7.73206
17902	rno-miR-15b-3p	2.08075	58	59.5	4.5	2	0.0132743	0.00637959
17883	rno-miR-19b-1-5p	N/A	52.5	56	1	0	0.00294985	N/A
29562	rno-miR-199a-5p	1.40233	144.5	118	92.5	61	0.272861	0.194577
42724	rno-miR-34b-3p	0.902918	1685.5	1727.5	1631.5	1671	4.81268	5.33014
42500	rno-miR-483-3p	N/A	54	55	-0.5	-1.5	N/A	N/A
10946	rno-miR-141-3p	0.288993	59	73.5	5	16	0.0147493	0.0510367
42606	rno-miR-330-3p	1.29447	631	471.5	579.5	414	1.70944	1.32057
30033	rno-miR-877	0.511931	67.5	86	15.5	28	0.0457227	0.0893142
14304	rno-miR-376b-3p	1.05146	3704.5	3268	3652	3212	10.7729	10.2456
11024	rno-miR-223-3p	1.36405	201	156.5	147.5	100	0.435103	0.318979
42579	rno-miR-193a-5p	N/A	55.5	56	1	-1.5	0.00294985	N/A
11221	rno-miR-300-3p	1.11644	1003.5	843.5	949.5	786.5	2.80088	2.50877
42462	rno-miR-883-5p	1.4829	462.5	313.5	410.5	256	1.21091	0.816587
42532	rno-miR-22-5p	0.985187	607.5	577.5	554.5	520.5	1.63569	1.66029
42845	rno-miR-125b-2-3p	1.06525	98	95	45.5	39.5	0.134218	0.125997
146160	rno-miR-133b-3p	1.01894	811.5	745.5	757.5	687.5	2.23451	2.19298
145707	rno-miR-216b-5p	N/A	54	55.5	0.5	-0.5	0.00147493	N/A
145836	rno-miR-218a-2-3p	1.20933	71	70	17	13	0.0501475	0.0414673
147162	rno-let-7a-5p	1.16901	2697	2148.5	2644.5	2092	7.80088	6.67305
147506	rno-miR-21-5p	1.10442	3087.5	2598.5	3034	2540.5	8.94985	8.10367
148657	rno-miR-381-5p	0.964493	137	138	85	81.5	0.250737	0.259968
148340	rno-miR-181a-2-3p	1.57438	227.5	159	174.5	102.5	0.514749	0.326954
148334	rno-miR-122-3p	N/A	55.5	56.5	3	-1	0.00884956	N/A
148451	rno-miR-344g	N/A	46	51	-7	-6	N/A	N/A
148483	rno-miR-466b-3p	1.09292	392.5	342	338	286	0.99705	0.912281
148439	rno-miR-2985	0.924779	69.5	72	15	15	0.0442478	0.0478469
148195	rno-miR-291b	N/A	49.5	49	-4	-6.5	N/A	N/A
148518	rno-miR-541-3p	1.35914	101	90.5	48.5	33	0.143068	0.105263
148115	rno-miR-3575	N/A	48	48	-5	-9	N/A	N/A
148348	rno-miR-3573-3p	0.952289	502.5	494.5	450	437	1.32743	1.39394
148300	rno-miR-370-5p	1.84956	60.5	60.5	8	4	0.0235988	0.0127592
148502	rno-miR-3549	N/A	55.5	57	1	-1	0.00294985	N/A
17316	rno-miR-488-3p	1.65978	328.5	210	275.5	153.5	0.812684	0.489633
168586	rno-miR-34a-5p	1.11605	14238.5	11809.5	14184.5	11753.5	41.8422	37.4912
14316	rno-miR-664-3p	0.94623	251.5	249.5	198.5	194	0.585546	0.61882
13179	rno-miR-455-5p	0.513766	83	106.5	30	54	0.0884956	0.172249
10972	rno-miR-181b-5p	1.11362	2172.5	1814	2120	1760.5	6.25369	5.61563
42852	rno-miR-760-3p	1.04745	108.5	104	55.5	49	0.163717	0.1563
33114	rno-miR-455-3p	0.743758	148	171.5	94.5	117.5	0.278761	0.374801
42881	rno-miR-463-3p	N/A	46.5	48	-5.5	-3.5	N/A	N/A
42641	rno-miR-145-5p	1.18976	2291.5	1796.5	2240.5	1741.5	6.60914	5.55502
14268	rno-miR-376a-5p	0.895522	403.5	417.5	352	363.5	1.03835	1.15949
14294	rno-miR-1-3p	2.2234	108	76.5	56.5	23.5	0.166667	0.0749601
30687	rno-miR-93-5p	0.801597	269	306.5	218	251.5	0.643068	0.802233
17917	rno-miR-873-5p	0.945249	444.5	437.5	392.5	384	1.15782	1.22488
42472	rno-miR-190b-5p	1.20591	134.5	117.5	81.5	62.5	0.240413	0.199362
14270	rno-miR-493-3p	N/A	58.5	55	5.5	0	0.0162242	N/A
42886	rno-miR-879-5p	0.924779	64.5	67.5	11.5	11.5	0.0339233	0.0366826
42694	rno-miR-485-3p	0.881235	264	277.5	212.5	223	0.626844	0.711324
23767	rno-miR-759	N/A	46	46	-6.5	-6.5	N/A	N/A
42474	rno-miR-362-3p	1.18079	166	143	113	88.5	0.333333	0.282297
146201	rno-miR-1839-3p	1.14409	422.5	355.5	373	301.5	1.10029	0.961722
145943	rno-miR-100-5p	0.882524	2249	2353	2193	2298	6.46903	7.33014
145845	rno-miR-20a-5p	0.791216	598.5	694	545	637	1.60767	2.0319
147514	rno-miR-494-3p	0.346792	53.5	58	1.5	4	0.00442478	0.0127592
148540	rno-miR-3570	N/A	44.5	45	-9.5	-10	N/A	N/A
148318	rno-miR-3574	N/A	46.5	46.5	-5.5	-7	N/A	N/A
148093	rno-miR-1912-3p	N/A	47.5	50	-4.5	-6.5	N/A	N/A
148320	rno-miR-128-2-5p	N/A	47	50	-1.5	-4.5	N/A	N/A
148397	rno-miR-664-1-5p	1.033	104	101.5	52.5	47	0.154867	0.14992
148113	rno-miR-496-3p	0.99701	508	476.5	455.5	422.5	1.34366	1.34769
148078	rno-miR-3577	0.924779	53.5	54	0.5	0.5	0.00147493	0.0015949
148458	rno-miR-3594-5p	N/A	47.5	51	-4.5	-3.5	N/A	N/A
148610	rno-miR-26a-3p	N/A	50.5	52	-1	-3	N/A	N/A
148343	rno-miR-3568	0.980265	105.5	104	53	50	0.156342	0.15949
148240	rno-miR-31b	N/A	47	50.5	-6.5	-4	N/A	N/A
168778	rno-miR-501-3p	N/A	48	49	-2.5	-4.5	N/A	N/A
169075	rno-miR-92a-3p	0.87366	240	252.5	188	199	0.554572	0.634769
13143	rno-miR-301a-3p	0.959074	2446	2362.5	2391	2305.5	7.0531	7.35407
17888	rno-let-7a-1-3p/rno-let-7c-2-3p	0.949001	602.5	591	548.5	534.5	1.61799	1.70494
31053	rno-miR-674-3p	0.879767	162.5	170.5	107.5	113	0.317109	0.360447
42660	rno-miR-144-5p	4.62389	64.5	59	10	2	0.0294985	0.00637959
17482	rno-miR-411-5p	0.896243	1248	1290	1193.5	1231.5	3.52065	3.92823
42739	rno-miR-339-5p	0.927882	205.5	207.5	149.5	149	0.441003	0.475279
11262	rno-miR-297	1.38717	56	59	1.5	1	0.00442478	0.00318979
42957	rno-miR-323-3p	0.950727	513	502	458	445.5	1.35103	1.42105
42621	rno-miR-879-3p	0.920108	155	154.5	98.5	99	0.29056	0.315789
46467	rno-miR-143-5p	1.26549	108	96	52	38	0.153392	0.121212
42475	rno-miR-221-5p	1.35333	86	79	30	20.5	0.0884956	0.0653907
42592	rno-miR-338-3p	0.554372	7555	12569	7500.5	12512	22.1254	39.9107
42969	rno-miR-10b-3p	1.00748	254.5	242	201	184.5	0.59292	0.588517
42902	rno-miR-185-5p	1.11038	1259.5	1062	1205.5	1004	3.55605	3.20255
10952	rno-miR-146a-5p	1.45777	740.5	492.5	686.5	435.5	2.02507	1.38915
42747	rno-miR-93-3p	1.92069	67.5	63.5	13.5	6.5	0.039823	0.0207337
42800	rno-miR-582-5p	1.07489	545.5	480.5	490.5	422	1.4469	1.34609
27558	rno-miR-155-5p	4.00737	63	59.5	6.5	1.5	0.019174	0.00478469
13177	rno-miR-143-3p	1.29224	6433	4620.5	6377.5	4564	18.8127	14.5582
42827	rno-miR-652-3p	1.18585	701.5	560.5	645	503	1.90265	1.60447
11226	rno-miR-325-5p	1.20488	327	266	271	208	0.79941	0.663477
145995	rno-miR-196b-3p	1.40873	202	154.5	147	96.5	0.433628	0.307815
145840	rno-let-7f-1-3p	0.851023	129	139.5	75	81.5	0.221239	0.259968
146112	rno-miR-30b-5p	0.976828	10338.5	9794	10284.5	9736.5	30.3378	31.0574
145640	rno-miR-328a-3p	0.959189	277.5	271	223	215	0.657817	0.685805
145756	rno-miR-488-5p	N/A	57.5	54	2.5	-3	0.00737463	N/A
147908	rno-miR-3065-5p	N/A	57.5	56	3	-1.5	0.00884956	N/A
148098	rno-miR-374-5p	1.20195	505.5	404.5	451	347	1.33038	1.10686
148626	rno-miR-497-3p	N/A	52	50.5	-3	-7	N/A	N/A
148668	rno-miR-378a-3p	1.08312	290.5	260	236	201.5	0.696165	0.642743
148023	rno-miR-653-5p	N/A	51.5	53	-3	-4	N/A	N/A
148438	rno-miR-295-3p	N/A	49.5	50.5	-5	-6.5	N/A	N/A
148309	rno-miR-3068-3p	0.658383	1245	1728	1190	1671.5	3.51032	5.33174
148031	rno-miR-19b-2-5p	N/A	52	53.5	-3	-4.5	N/A	N/A
148512	rno-miR-187-5p	0.836101	153	166.5	99	109.5	0.292035	0.349282
148059	rno-miR-493-5p	0.792767	2907.5	3386	2852.5	3327.5	8.41445	10.614
148541	rno-miR-3543	N/A	48	49.5	-7	-8	N/A	N/A
148011	rno-miR-702-3p	0.875675	162.5	171	107	113	0.315634	0.360447
148211	rno-miR-3590-3p	0.924779	56.5	59	1	1	0.00294985	0.00318979
148383	rno-miR-103-2-5p	1.38717	58.5	61.5	4.5	3	0.0132743	0.00956938
148326	rno-miR-344b-5p	N/A	55	57	0	-0.5	N/A	N/A
148223	rno-miR-3569	N/A	50	54.5	-5	-3	N/A	N/A
148026	rno-miR-3566	N/A	47.5	49.5	-6	-8.5	N/A	N/A
148245	rno-miR-582-3p	1.04692	84	83	30	26.5	0.0884956	0.0845295
42570	rno-miR-194-3p	0.616519	56	60	2	3	0.00589971	0.00956938
42620	rno-miR-188-5p	1.06178	69.5	70	15.5	13.5	0.0457227	0.0430622
42453	rno-miR-376c-5p	1.03729	579.5	525.5	525.5	468.5	1.55015	1.49442
168819	rno-miR-200a-3p	N/A	51	53.5	-3.5	-4.5	N/A	N/A
168968	rno-miR-147	1.68142	64	63.5	10	5.5	0.0294985	0.0175439
17822	rno-miR-490-5p	1.02255	178.5	170	125.5	113.5	0.370206	0.362041
14290	rno-miR-541-5p	1.42351	404.5	287.5	352.5	229	1.03982	0.730463
13150	rno-miR-322-5p	1.3617	560	401.5	508	345	1.49853	1.10048
42668	rno-let-7c-1-3p	1.23545	139.5	120.5	85.5	64	0.252212	0.204147
42963	rno-miR-742-3p	0.95423	134.5	135.5	81	78.5	0.238938	0.250399
11014	rno-miR-214-3p	2.10965	97.5	72.5	36.5	16	0.10767	0.0510367
42925	rno-miR-409a-5p	0.817355	230	254	175	198	0.516224	0.631579
42626	rno-miR-30b-3p	1.5002	89	78	36.5	22.5	0.10767	0.0717703
46859	rno-miR-135a-3p	1.81466	105	83	52	26.5	0.153392	0.0845295
10985	rno-miR-191a-5p	0.941529	4211.5	4142	4159.5	4085.5	12.2699	13.0319
42889	rno-miR-379-3p	1.38977	321	234.5	267.5	178	0.789086	0.567783
11078	rno-miR-365-3p	0.831414	1048	1152	984	1094.5	2.90265	3.49123
42741	rno-miR-760-5p	0.719272	71	78.5	17.5	22.5	0.0516224	0.0717703
11066	rno-miR-337-3p	0.977761	256.5	250.5	203	192	0.59882	0.61244
29852	rno-miR-9a-3p	0.936001	31163	30795.5	31110.5	30737.5	91.7714	98.0463
42477	rno-miR-324-5p	1.13496	79.5	78	27	22	0.079646	0.0701754
42931	rno-miR-218a-1-3p	2.378	61.5	59.5	9	3.5	0.0265487	0.0111643
42792	rno-miR-29b-5p	1.4071	229	172.5	176.5	116	0.520649	0.370016
146059	rno-miR-105	N/A	53.5	56	-1	-1	N/A	N/A
145914	rno-miR-135b-5p	0.928012	341.5	342.5	287	286	0.846608	0.912281
146049	rno-miR-28-5p	1.0807	153.5	142	100.5	86	0.29646	0.274322
145857	rno-miR-154-5p	0.903925	614.5	633.5	563.5	576.5	1.66224	1.83892
147943	rno-miR-3074	N/A	54	53	1	-4	0.00294985	N/A
148644	rno-miR-551b-3p	1.83226	1059.5	565.5	1006.5	508	2.96903	1.62041
148139	rno-miR-3596c	1.29469	221	181	168	120	0.495575	0.382775
148054	rno-miR-547-5p	1.02496	118.5	118	66.5	60	0.196165	0.191388
148237	rno-miR-337-5p	0.756637	90	99	36	44	0.106195	0.140351
148568	rno-miR-3586-5p	1.15597	72	69.5	17.5	14	0.0516224	0.0446571
148299	rno-miR-802-3p	N/A	49.5	49.5	-4	-7	N/A	N/A
148311	rno-miR-1912-5p	N/A	48	47	-4.5	-10	N/A	N/A
148117	rno-miR-3551-5p	N/A	47.5	47.5	-5	-8	N/A	N/A
148550	rno-miR-328a-5p	N/A	48.5	48.5	-4	-7.5	N/A	N/A
148144	rno-miR-881-5p	N/A	54	56	1	-1.5	0.00294985	N/A
148422	rno-miR-301b-5p	2.57617	76	63	19.5	7	0.0575221	0.0223285
148123	rno-miR-100-3p	1.27157	76	73.5	22	16	0.0648968	0.0510367
148255	rno-miR-673-3p	1.13029	64.5	64.5	11	9	0.0324484	0.0287081
148176	rno-miR-211-3p	N/A	47.5	48	-5.5	-10	N/A	N/A
148068	rno-miR-758-5p	1.148	107	101	54	43.5	0.159292	0.138756
148182	rno-miR-3596b	0.924779	74	76.5	19.5	19.5	0.0575221	0.062201
11238	rno-miR-380-3p	0.857522	256	276	204	220	0.60177	0.701754
168689	rno-miR-361-3p	0.956668	114	113.5	60	58	0.176991	0.185008
169330	rno-miR-23b-3p	0.881541	4149	4355.5	4098	4299	12.0885	13.7129
